1  
2  
3  
4  
5  
6  
7  
8  
9  
10  
11  
12  
13  
14  
15  
16  
17  
18  
19  
20  
21  
22  
23

(FULL) Novel feeding and mating behaviors of a population of nautilus, *Nautilus belauensis*,  
in Palau

(SHORT) On the normally, abnormal behaviors of Palauan nautilus.

Gregory J. Barord<sup>1\*</sup>, Rebecca L. Swanson<sup>2</sup>, and Peter D. Ward<sup>3</sup>

<sup>1</sup>Department of Marine Sciences, Central Campus, Des Moines, Iowa USA

<sup>2</sup>College of Natural Sciences and Oceanography, Nova Southeastern University, Ft. Lauderdale,  
Florida USA

<sup>3</sup>Department of Biology, University of Washington, Seattle, Washington USA

\*Corresponding author

E-mail: [gjbarord@gmail.com](mailto:gjbarord@gmail.com) (GJB)

24 Abstract

25 The nautiloid lineage extends back nearly 500 million years but today, is represented by only two  
26 living genera, *Nautilus* and *Allonautilus*. Behavioral observations of these living nautiluses have  
27 improved our understanding of how nautiloids, and ammonoids, behaved and interacted in their  
28 environment. These behaviors may also help to inform conservation practices. Here, we describe  
29 feeding and mating behaviors in wild nautiluses not reported from any other population. In  
30 Palau, *Nautilus belauensis* was observed actively preying on a large, living crab (*Chaceon* sp.)  
31 and performing courtship-like behaviors prior to mating. These behaviors occurred across  
32 multiple nights and from different nautiluses, suggesting that the behaviors are characteristic of  
33 at least a subset of the population, if not the entire population. Perhaps the behaviors exhibited by  
34 the Palauan nautiluses are an outlier and simply a localized characteristic of a far-removed  
35 population. Or, perhaps these apparent abnormal behaviors of Palauan nautiluses are what all  
36 nautiluses across the Indo-Pacific should be exhibiting. If the latter explanation is correct, we can  
37 start to address the potential causes of the behavioral differences, such as population size, habitat  
38 type, and prey availability. In either case, this apparent behavioral plasticity may have also been  
39 a reason that the nautiloid lineage has been able to survive throughout millions of years of  
40 environmental changes. Today, these behavioral observations could prove to be a valuable  
41 conservation tool to protect species and environments, especially in the deep-sea ecosystem the  
42 nautiluses inhabit.

43

44

45

46

## 47 **Introduction**

48 Living nautilus (extant species of *Nautilus* and *Allonautilus*) are the last vestiges of an ancient  
49 500-million-year-old nautiloid lineage that have provided invaluable information about  
50 morphologically similar, but extinct, taxa<sup>1,2</sup>. Behaviors of living nautilus have informed how  
51 ancient ecosystems may have functioned, but as nautilus populations continue to decline<sup>3,4,5</sup>,  
52 these behaviors may be more informative of healthy and unhealthy populations. Related to  
53 octopuses, squid, and cuttlefish, living nautilus most closely resemble their ancient nautiloid  
54 counterparts, characterized by a hard, external shell. Today, nautilus inhabit the deep-sea coral  
55 reef slopes across the Indo-Pacific from 0-700 meters<sup>6</sup>. Their habitat is constrained by warm,  
56 surface water temperatures of 25 °C, depth implosion limits at 800 meters, and a nektonic  
57 lifestyle<sup>7,8,9</sup>. Nautilus locate food in the deep-sea using their large olfactory organs and dozens  
58 of sticky tentacles<sup>10</sup> to cue in on dead prey items. Unlike many cephalopods, nautilus are  
59 iteroparous, mature late, produce few offspring, and the embryos have long developmental  
60 times<sup>11,12,13,14</sup>. Nautilus are highly prized for their ornamental shell that can be sold whole, or  
61 made into jewellery, furniture inlay, or other curio items<sup>4</sup>, significantly depleting populations<sup>5,15</sup>.  
62 To survey nautilus populations, baited remote underwater video systems (BRUVS) have become  
63 the standard for use with nautilus and their deep-sea habitat, or “nautilus zone”, between 100-  
64 700 meters. In addition to providing population data, the BRUVS also record behaviors that  
65 otherwise would not be known and in Palau, the video data showed nautilus behaviors not  
66 reported from any other populations.

67 The nautilus of Palau represent the northernmost range of Family Nautilidae with no  
68 known historical fisheries in the region. In the literature, these nautilus have been described  
69 morphologically as *Nautilus belauensis*<sup>16</sup> and recent genetic analyses have provided increased

70 support for *N. belauensis* as a distinct species<sup>17,18</sup>, apart from the widespread *Nautilus pompilius*,  
71 though this has not been settled. However, for this paper, we will refer to the nautilus of Palau  
72 as *Nautilus belauensis* to avoid confusion between other populations of nautilus. *Belauensis* is  
73 also commonly known within practice and the culture of Palau (or Belau) to describe the  
74 nautilus therein.

75 Nautilus are highly adapted to locating food in the deep-sea. They have large olfactory  
76 organs, called the rhinophores<sup>19</sup>, and dozens of protractible and retractable tentacles<sup>10</sup>. Nautilus  
77 have been described as predators, scavengers, and opportunistic predators/scavengers<sup>20,21</sup> but no  
78 direct behavioral evidence is available on their actual diet in the wild. In aquariums, nautilus  
79 are fed a varied diet centred on prepared, frozen shrimp<sup>22</sup>. Nautilus are commonly displayed  
80 with other marine organisms, though there are no published reports of active predation on these  
81 co-habitants. Using time lapse photography, nautilus in Palau did not prey on live prey items,  
82 but traps with shrimps, sharks, and fishes did show nautilus bite marks<sup>21</sup>, though it is not clear  
83 what condition the organisms were in, dead, near-dead, or alive, or if the bites were predatory.

84

## 85 **Materials and Methods**

### 86 *Baited Remote Underwater Video Systems*

87 Baited remote underwater video systems (BRUVS) were used record the behavior of nautilus,  
88 and other species, attracted to a bait source over a fixed period. Each baited remote underwater  
89 video system, or BRUVS, is composed of one HD-camcorder in an underwater housing and one  
90 LED light source in an underwater housing affixed to a steel frame (1m<sup>3</sup>) with a bait stick  
91 extending off the front 2 meters and a rope attached to a surface buoy. The BRUVS were  
92 deployed at dusk to a depth of 250-300 meters using a Furuno Fish Finds (MODEL FCV587)

93 and retrieved 12 hours later at dawn. Upon retrieval, the video data was transferred to an external  
94 hard drive and the BRUVS were fitted for deployment later that day. The video data was later  
95 analysed for nautilus behaviors, habitat type, species composition, and population abundance.  
96 All methods were carried out in accordance with relevant guidelines and regulations. No  
97 nautilus, or other animals, were removed from their habitats or handled in any way with only  
98 the video data taken.

99

## 100 **Results and Discussion**

### 101 *Feeding Behaviors*

102 Previous observations from BRUVS in all other populations of nautilus surveyed show a  
103 negative, or at least passive, response to potential living prey items<sup>23,24</sup>. In each case, the  
104 nautilus showed no positive response to live shrimp, crabs, or fishes near the bait source, and  
105 seemingly within the grasp of the nautilus' tentacles (Figure 1). In Palau, a *N. belauensis* was  
106 observed performing predatory-like behaviors on a large crab, *Chaceon* sp. (Fig 2a-d). The  
107 nautilus jets to the posterior of the crab (Fig 2a), attaches with its tentacles (Fig 2b), attempts to  
108 jet away with the crab (Fig 2c), and finally detaches after the crab attempts to pinch the nautilus  
109 (Fig 2d). Thereafter, the nautilus continues to “hunt” the crab until both are out of frame. On a  
110 separate night, multiple nautilus were recorded performing similar predator type behaviors on  
111 the same crab species.

112

113 Figure 1. *Nautilus pompilius* feeding on raw chicken bait at 300 meters in the Philippines.

114

115

116 Figure 2 (a-d). *Nautilus belauensis* in Palau displaying predatory behaviors on a large crab,  
117 *Chaceon*, by latching on with its tentacles (2a), attempting to jet away (2b), being pinched by the  
118 crab (2c), and moving into the defensive position with tentacles contracted in shell (2d).

119

120 Aside from predation on the crab, the behaviors could be interpreted differently. First, the  
121 predation may not be on the actual crab, but parasites that are living on the crabs' carapace.

122 There are many examples of marine fishes and crustaceans that groom larger fishes of parasites  
123 in a symbiotic relationship<sup>25,26</sup>. However, the behaviors of the nautilus and crabs do not

124 support any type of evolved symbiosis for parasite removal; the nautilus attempts to jet away  
125 with the crab while the crab eventually pinches the nautilus with its chelipeds. An additional

126 explanation could be that the nautilus was attempting to lay one of its few eggs on a moving,

127 hard substrate, which was a crab in this case. In aquariums, nautiluses have laid eggs on other

128 nautiluses on rare occasions (Pers Comm). But again, the initial behavior of latching on to the

129 crab and attempting to jet away is more characteristic of finding food and taking it somewhere

130 else to consume, rather than egg-laying. Finally, these behaviors may be related to competition-

131 related behaviors between the nautilus and crab as both are scavenging on the bait, the nautilus

132 behavior may be defensive as to protect its food source.

133

### 134 *Mating Behaviors*

135 A second, previously undescribed behavior was also recorded from the BRUVS. Nautilus  
136 reproduction has most commonly been studied in laboratory and aquarium settings because of

137 the limited access to the deep-sea, nautilus zone. Recently, a growing number of wild

138 observations utilizing BRUVS are becoming available<sup>3,5,24</sup>. Based on our current understanding

139 of nautilus reproduction, mating in nautilus can best be described as a “trial and error” strategy  
140 with males attempting to mate with any sex. As nautilus approach the bait source, they usually  
141 will feed first, and then locate a suitable mate. Male nautilus are attracted to both male and  
142 female nautilus, whereas female nautilus are attracted to males, but repelled by other  
143 females<sup>27</sup>. These behaviors are present in aquarium observations with known sexes and appear in  
144 wild video observations. If we apply this proxy to wild populations, it is possible to discern  
145 potential males from the video. *Nautilus belauensis* shows similar mating behaviors to other  
146 populations throughout each video, across sampling days, and across individuals. However, the  
147 difference in *N. belauensis* is that the presumed male nautilus curls its tentacles along the  
148 posterior of the shell of each nautilus it encounters (Fig 3), a behavior not recorded from any  
149 other population of nautilus across the Indo-Pacific.

150

151 Figure 3. *Nautilus belauensis* performing courtship-like behaviors recorded from BRUVS  
152 typified by the curling of the tentacles tips on the shell of other nautilus.

153

154 This curling behavior could simply be an artefact of tentacle movements, characteristic of  
155 the Palauan nautilus and have no importance in mate selection and reproduction. If this were  
156 the case, we would expect to also observe the curling tentacles during feeding behaviors and  
157 other movements, which we do not. We cannot determine what the curling of tentacles on the  
158 nautilus shell is signalling from these observations and whether the nautilus with curled tentacles  
159 is sending a signal, or vice versa. What we can say is that mating (Figure 4) does occur after the  
160 tentacle curling behaviors of the nautilus.

161

162 Figure 4. *Nautilus belauensis* mating, tentacles to tentacles, after displaying the courtship-like  
163 behaviors of curled tentacles on the shell.

164

165           Particularly related to behavior, we understand that the BRUVS rely on a fixed bait  
166 source to attract nautilus, and other organisms, that potentially would not meet otherwise.  
167 However, this practice may mimic precisely how scavengers locate food in the deep-sea, where  
168 food is scarce. Deep sea scavengers may rely on windfall events when large prey items die and  
169 drift to the bottom of the sea<sup>28</sup>. The increased number of scavengers may, in turn, attract larger  
170 predators, different species, and greater abundances of specific species. If this is the case, then  
171 we can draw more concrete conclusions about the deep-sea ecosystem and relationships of  
172 animals utilizing BRUVS.

173           Taking these two behaviors together, we can assume that these are isolated anomalies of  
174 *N. belauensis* that evolved independent of other populations. Or, we can conclude that these  
175 behaviors are, in fact, indicators of a normal, healthy population of nautilus suggesting a  
176 complex behavioral plasticity of nautilus under different environmental conditions. In Palau,  
177 there are no commercial fishing activities of nautilus. Their catch rates and population  
178 abundance (GJB, RS, & PDW, In Prep) are greater than other populations and may not just  
179 signify a healthy nautilus population, but a healthy nautilus zone, between 100-700 meters.  
180 Increased populations of nautilus would need to be supported by increased numbers of prey  
181 items and resources. With additional resources, nautilus may be able to shift to become more  
182 active predators, expending more energy to locate higher valued prey items with a greater energy  
183 return. Increased resources may also impact nautilus behavior by bringing nautilus, which are  
184 presumed to be solitary, in closer proximity to other nautilus during feeding events. The



185 proximity to other nautilus, then, may provide for a type of sexual selection, either by the male  
186 or female. Sexual selection has been described in other cephalopods, including *Sepia apama*  
187 where the females choose their mates<sup>29</sup>. In contrast, populations with fewer nautilus may rely  
188 more heavily on a strict scavenging strategy to conserve energy while searching out prey items  
189 and when encountering other nautilus, forego any courtship behaviors to instead, simply pass  
190 on their genes and mate.

191

## 192 **Conclusions**

193 Looking to the past, the behaviors of *N. belauensis* could help inform our understanding  
194 of how the nautiloid ancestors may have behaved and interacted with their ecosystem. Few  
195 species can truly serve as a model for how its fossilized ancestors may have behaved, while also  
196 serving as a sign of what the future may be. Utilizing behavior as a conservation tool to assess  
197 population and ecosystem health is useful, particularly in areas like the nautilus zone that are  
198 difficult to survey scientifically, but relatively easy to exploit by fishermen.

199

## 200 **Acknowledgments**

201 The authors thank the Coral Reef Research Foundation for assistance on equipment construction  
202 and gear deployment.

203

## 204 **References**

- 205 1. Saunders, B. & Landman, N. *Nautilus: The Biology and Paleobiology of a Living Fossil*.  
206 Reprint with additions. New York, Plenum Press, DOI: 10,1007/978-90-481-3299-7 (2010).  
207 2. Ward, P. *The Natural History of Nautilus*. Winchester, Allen and Unwin, 281 p (1987).

- 208 3. Dunstan, A., Bradshaw, C., & Marshall J. Nautilus at risk-estimating population size and  
209 demography of *Nautilus pompilius*. *PLoS ONE* **6**, e16716 (2011).
- 210 4. DeAngelis, P. Assessing the impact of international trade on chambered nautilus. *Geobios* **45**,  
211 5-11 (2012).
- 212 5. Barord, G.J., et al. Comparative population assessments of *Nautilus* sp. in the Philippines,  
213 Australia, Fiji, and American Samoa using baited remote underwater video systems. *PLoS ONE*  
214 **9**(6), e100799 doi:10.1371/journal.pone.0100799 (2014).
- 215 6. Dunstan, D. & Ward, P. Vertical distribution and migration patterns of *Nautilus pompilius*.  
216 *PLoS ONE* **6**, e16311 (2011).
- 217 7. Ward, P.D., Greenwald, L., & Rougerie. Shell implosion depth for living *Nautilus*  
218 *macromphalus* and shell strength of extinct cephalopods. *Lethaia*, 13-18 (1980).
- 219 8. Carlson, B.A. Collection and aquarium maintenance of *Nautilus*. In: Saunders, W.B. &  
220 Landman, N.H. (eds), *Nautilus: The Biology and Paleobiology of a Living Fossil*. New York,  
221 Plenum Press, 563-578 (2010).
- 222 9. Ward, P.D., & Martin, A.W. Depth distribution of *N. pompilius* in Fiji and *N. macromphalus*  
223 in New Caledonia. *Veliger* **22**, 259-264 (1980).
- 224 10. Bidder, A.M. Use of tentacles, swimming, and buoyancy control in the pearly *Nautilus*.  
225 *Nature* **196**, 451-454 (1962).
- 226 11. Landman, N.H., Cochran, J.K., & Saunders, W.B. Growth and longevity of *Nautilus*. In:  
227 Saunders, W.B., & Landman, N.H. (eds.), *Nautilus: Biology and Paleobiology of a Living Fossil*.  
228 New York: Plenum Press. pp. 401–420 (2010).
- 229 12. Saunders, W.B. Natural rates of growth and longevity of *Nautilus belauensis*. *Paleobiology*  
230 **9**, 280–288 (1983).

- 231 13. Saunders, W.B. *Nautilus* growth and longevity: Evidence from marked and recaptured  
232 animals. *Science* **224**, 990–992 (1984).
- 233 14. Okubo, S., Tsujii, T., Watabe, N., & Williams, D.F. Hatching of *Nautilus-belauensis* in  
234 captivity - culture, growth and stable-isotope compositions of shells, and histology and  
235 immunohistochemistry of the mantle epithelium of the juveniles. *Veliger* **38**, 192–202 (1995).
- 236 15. Dunstan, A., Alanis, O., & Marshall, J. *Nautilus pompilius* fishing and population decline in  
237 the Philippines: A comparison with an unexploited Australian *Nautilus* population. *Fish Res* **106**,  
238 239–247 (2010).
- 239 16. Saunders, W.B. A new species of *Nautilus* from Palau. *Veliger* **24**,1-7 (1981).
- 240 17. Vandepas, L.E., Dooley, F.D., Barord, G.J., Swalla, B.J., & Ward, P.D. A revisited  
241 phylogeography of *Nautilus pompilius*. *Ecology and Evolution* **6**:14, 4924-4935 (2016).
- 242 18. Combosch, D.J., Lerner, S., Ward, P.D., Landman, N.H., & Giribet, G. Genomic signatures  
243 of evolution in *Nautilus*—An endangered living fossil. *Molecular Ecology* **26**:21 5923-5938  
244 (2017).
- 245 19. Basil, J.A., et al. The function of the rhinophores and tentacles of *Nautilus pompilius* L.  
246 (Cephalopoda, Nautiloidea) in orientation to odor. *Marine and Freshwater Behavior and*  
247 *Physiology* **38**:3, 209-221 (2005).
- 248 20. Ward, P.D. & Wickstein, M.K. Food sources and feeding behavior of *Nautilus*  
249 *macromphalus*. *Veliger* **23**, 119-124 (1980).
- 250 21. Saunders, W.B. The role and status of *Nautilus* in its natural habitat: Evidence from deep-  
251 water remote camera photo sequences. *Paleobiology* **10**, 469-486 (1984).
- 252 22. Barord, G.J. & Basil, J.A. *Nautilus* In: Inglesias, J., Fuentes, L., & Villanueva, R.  
253 *Cephalopod Culture*. New York, Springer Science 165-174 (2014).

- 254 23. Barord, G.J. On the biology, behavior, and conservation of the chambered nautilus, *Nautilus*  
255 sp. *CUNY Academic Works*, 96 p (2015).
- 256 24. Ward, P.D., Dooley, F., & Barord, G.J. *Nautilus*: biology, systematics, and Paleobiology as  
257 viewed from 2015. *Swiss J Palaeontol* **135**, 169-185 (2016).
- 258 25. Johnson, P.T.J., et al. When parasites become prey: ecological and epidemiological  
259 significance of eating parasites. *Trends in Ecology and Evolution* **25**, 362–371 (2010).
- 260 26. Cote, J.M. Evolution and ecology of cleaning symbioses in the sea. *Oceanography and*  
261 *Marine Biology*. **38**, 311-355 (2000).
- 262 27. Basil, J.A., Lazenby, G.B., Nakanuku, L., & Hanlon, R.T. Female *Nautilus* are attracted to  
263 male conspecific odor. *Bulletin of Marine Science* **70**, 217-225 (2002).
- 264 28. Smith, C.R. Food for the deep sea: utilization, dispersal, and flux of nekton falls at the Santa  
265 Catalina basin floor. *Deep Sea Research Part A. Oceanographic Research Papers* **32**:4, 417-422  
266 (1985).
- 267 29. Hall, K.C. & Hanlon, R.T. Principal features of the mating system of a large spawning  
268 aggregation of the giant Australian cuttlefish *Sepia apama* (Mollusca: Cephalopoda). *Marine*  
269 *Biology* **140**, 533-545 (2002).

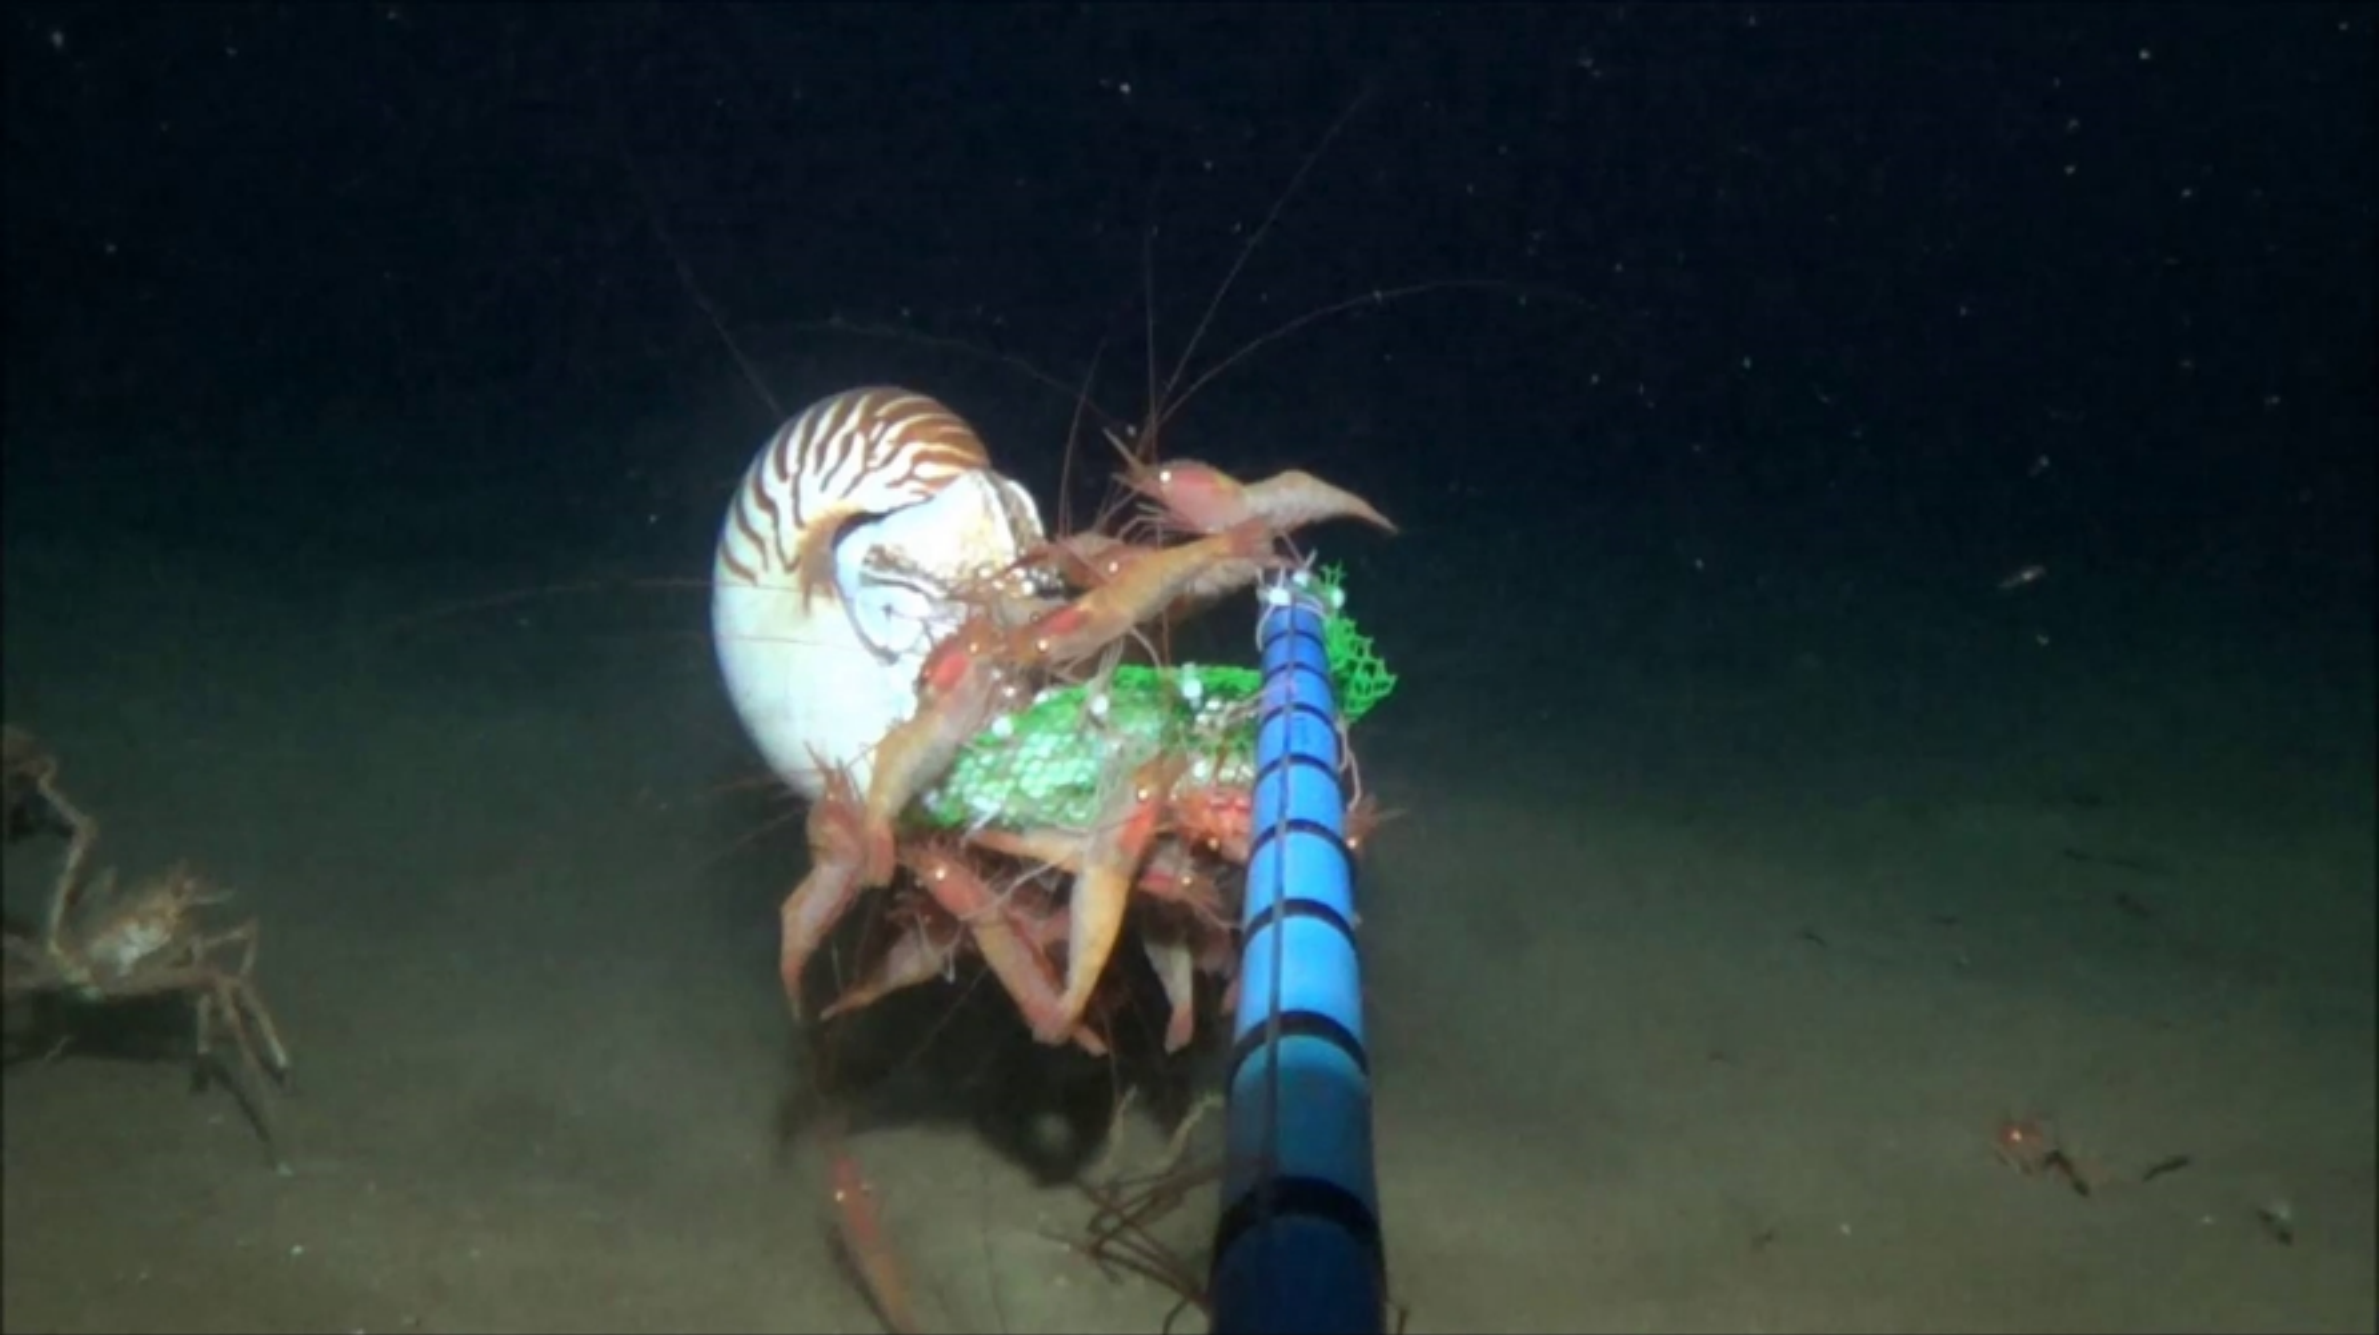

Figure 1



**a****b**

bioRxiv preprint doi: <https://doi.org/10.1101/622456>; this version posted April 29, 2019. The copyright holder for this preprint (which was not certified by peer review) is the author/funder, who has granted bioRxiv a license to display the preprint in perpetuity. It is made available under aCC-BY 4.0 International license.

**c****d****Figure 2**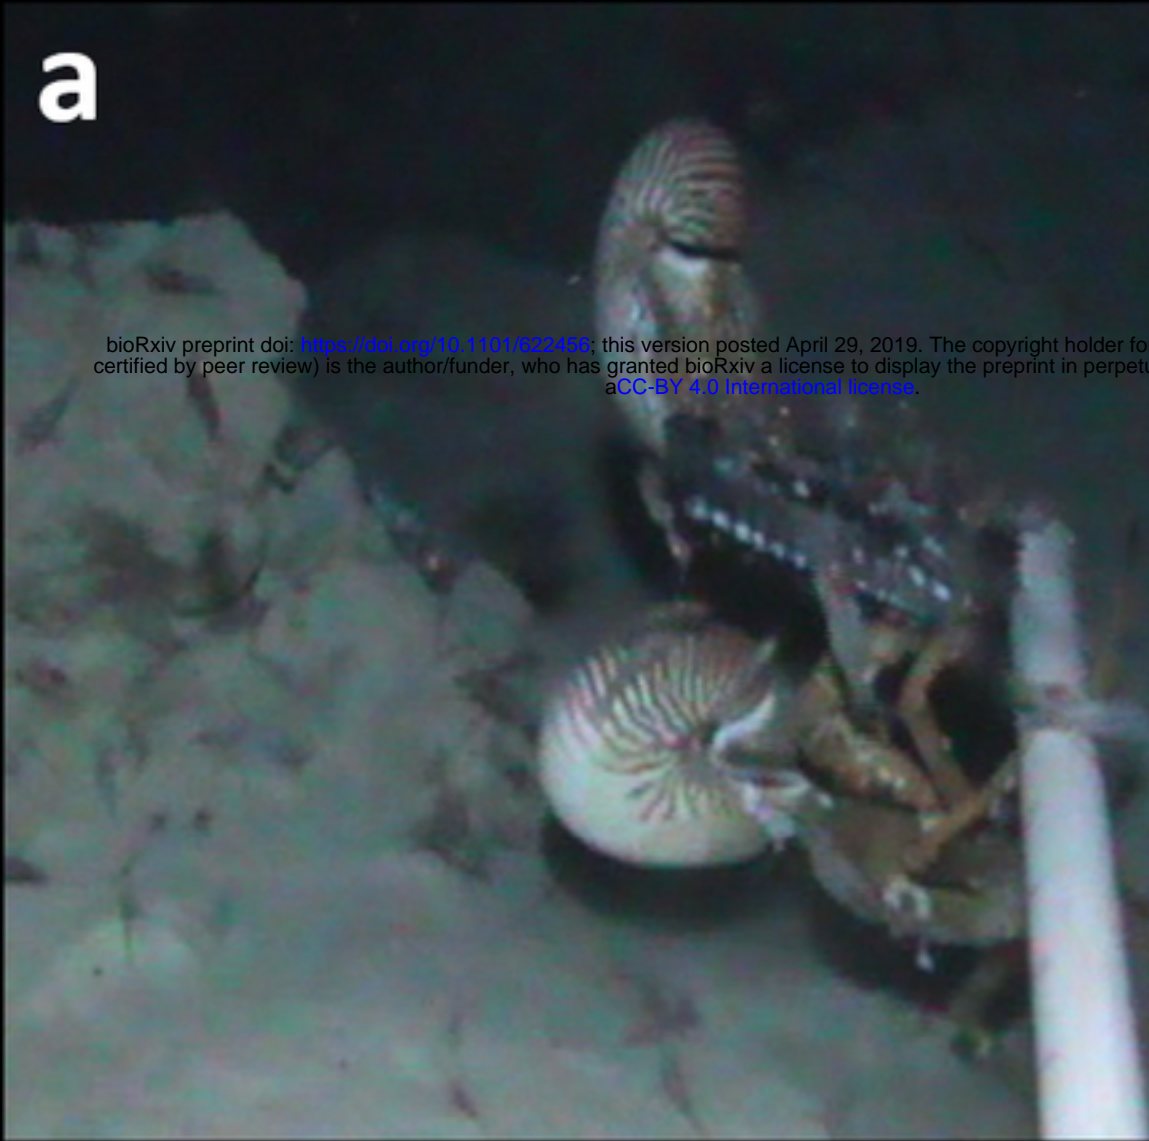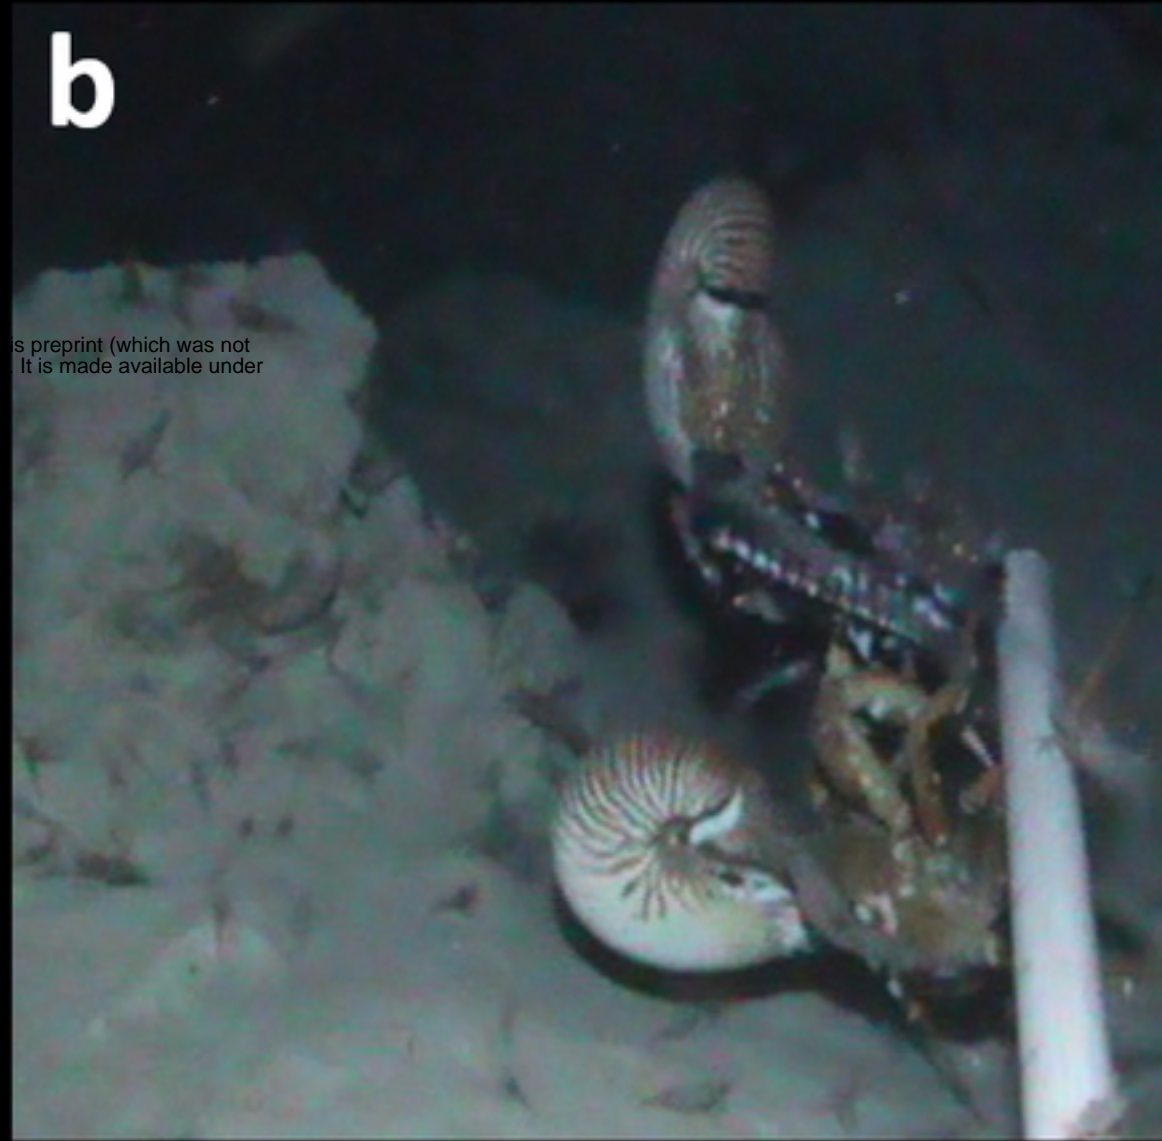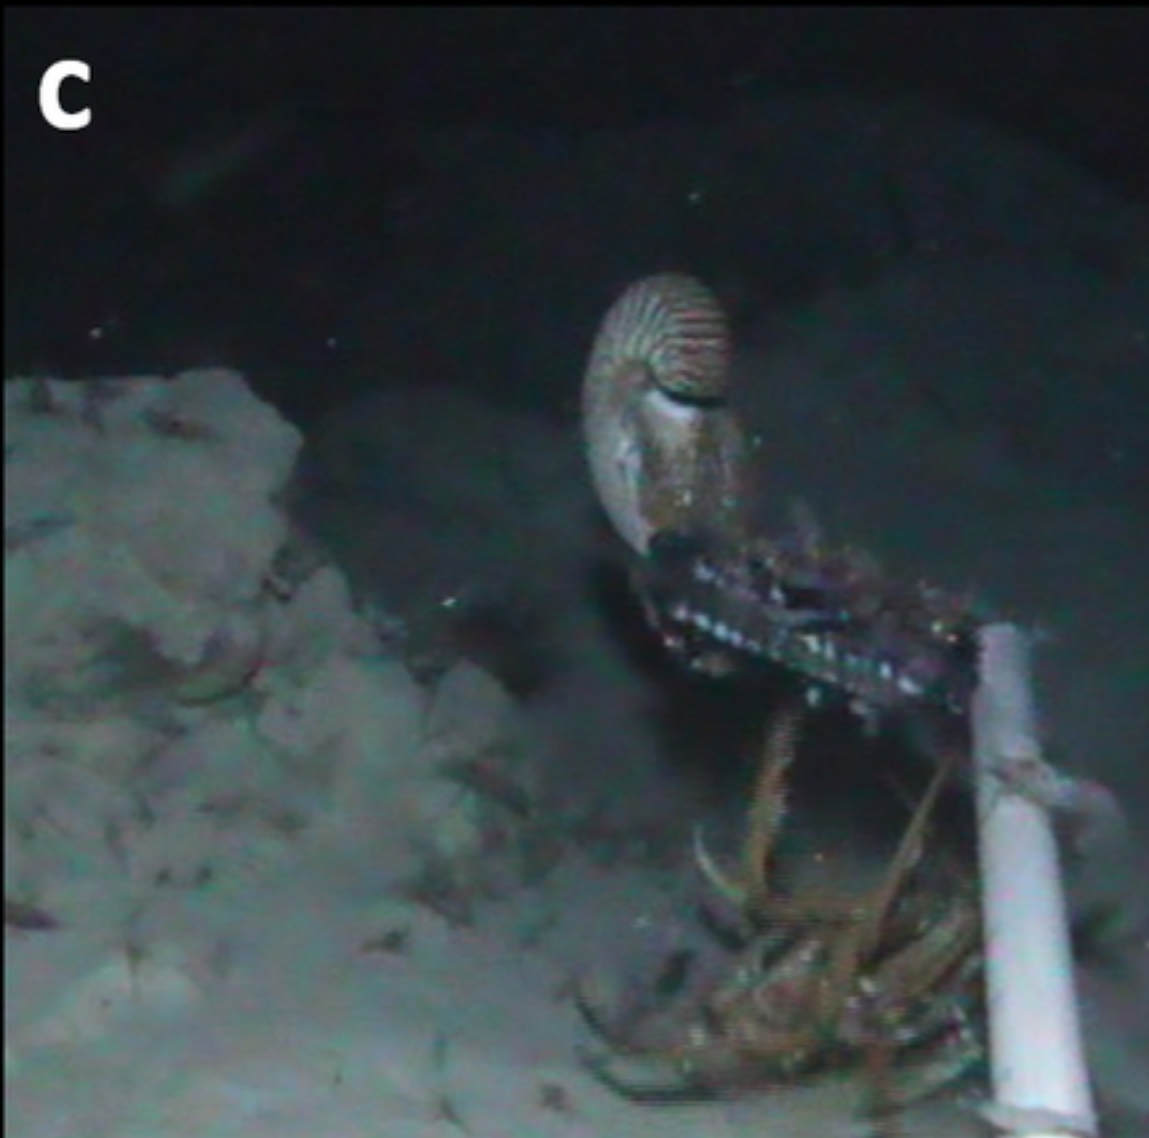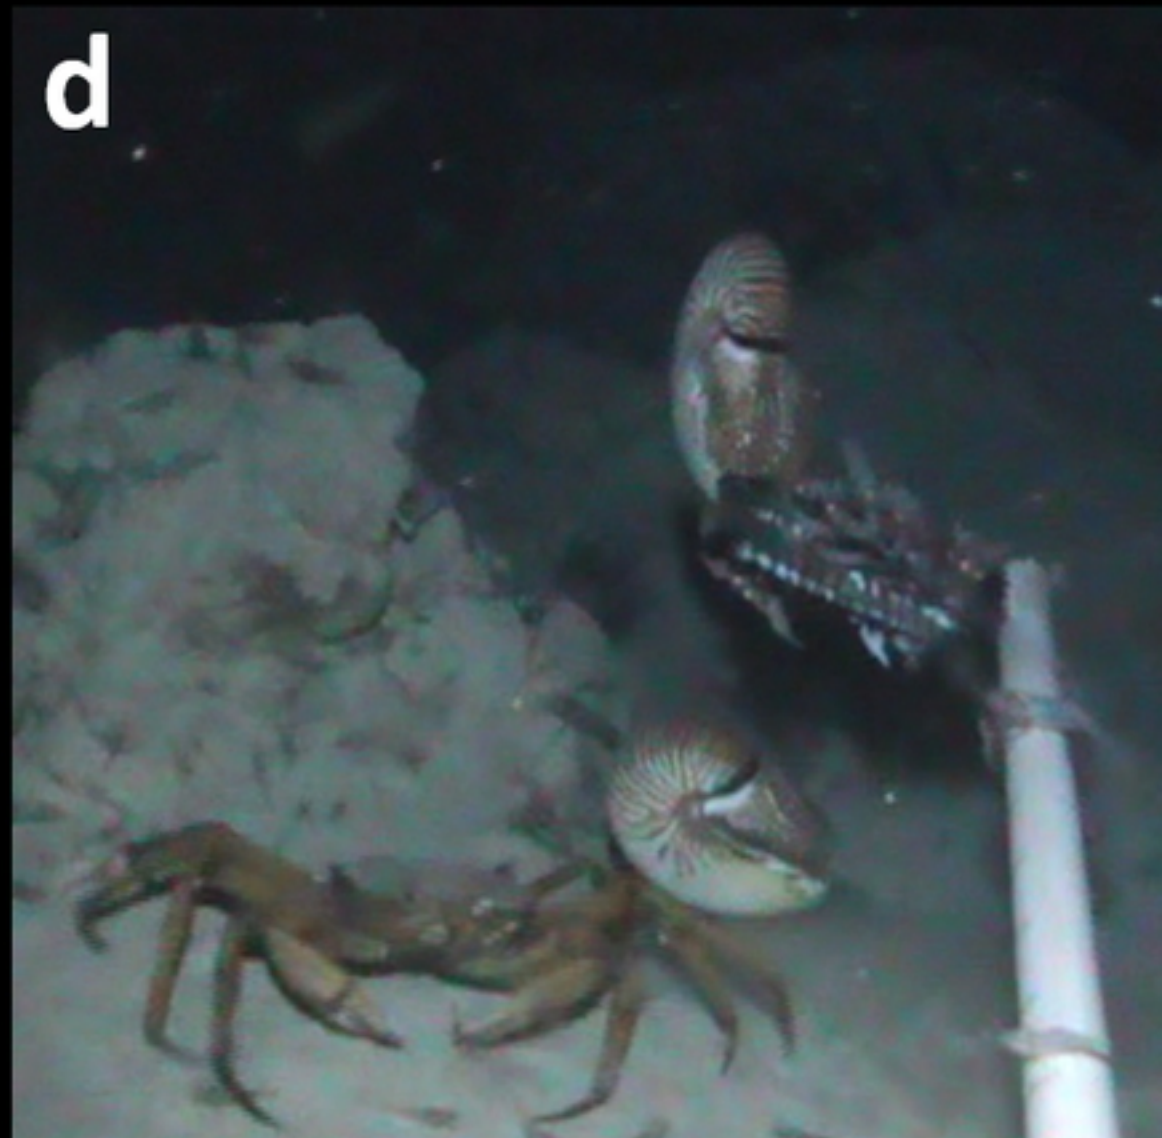



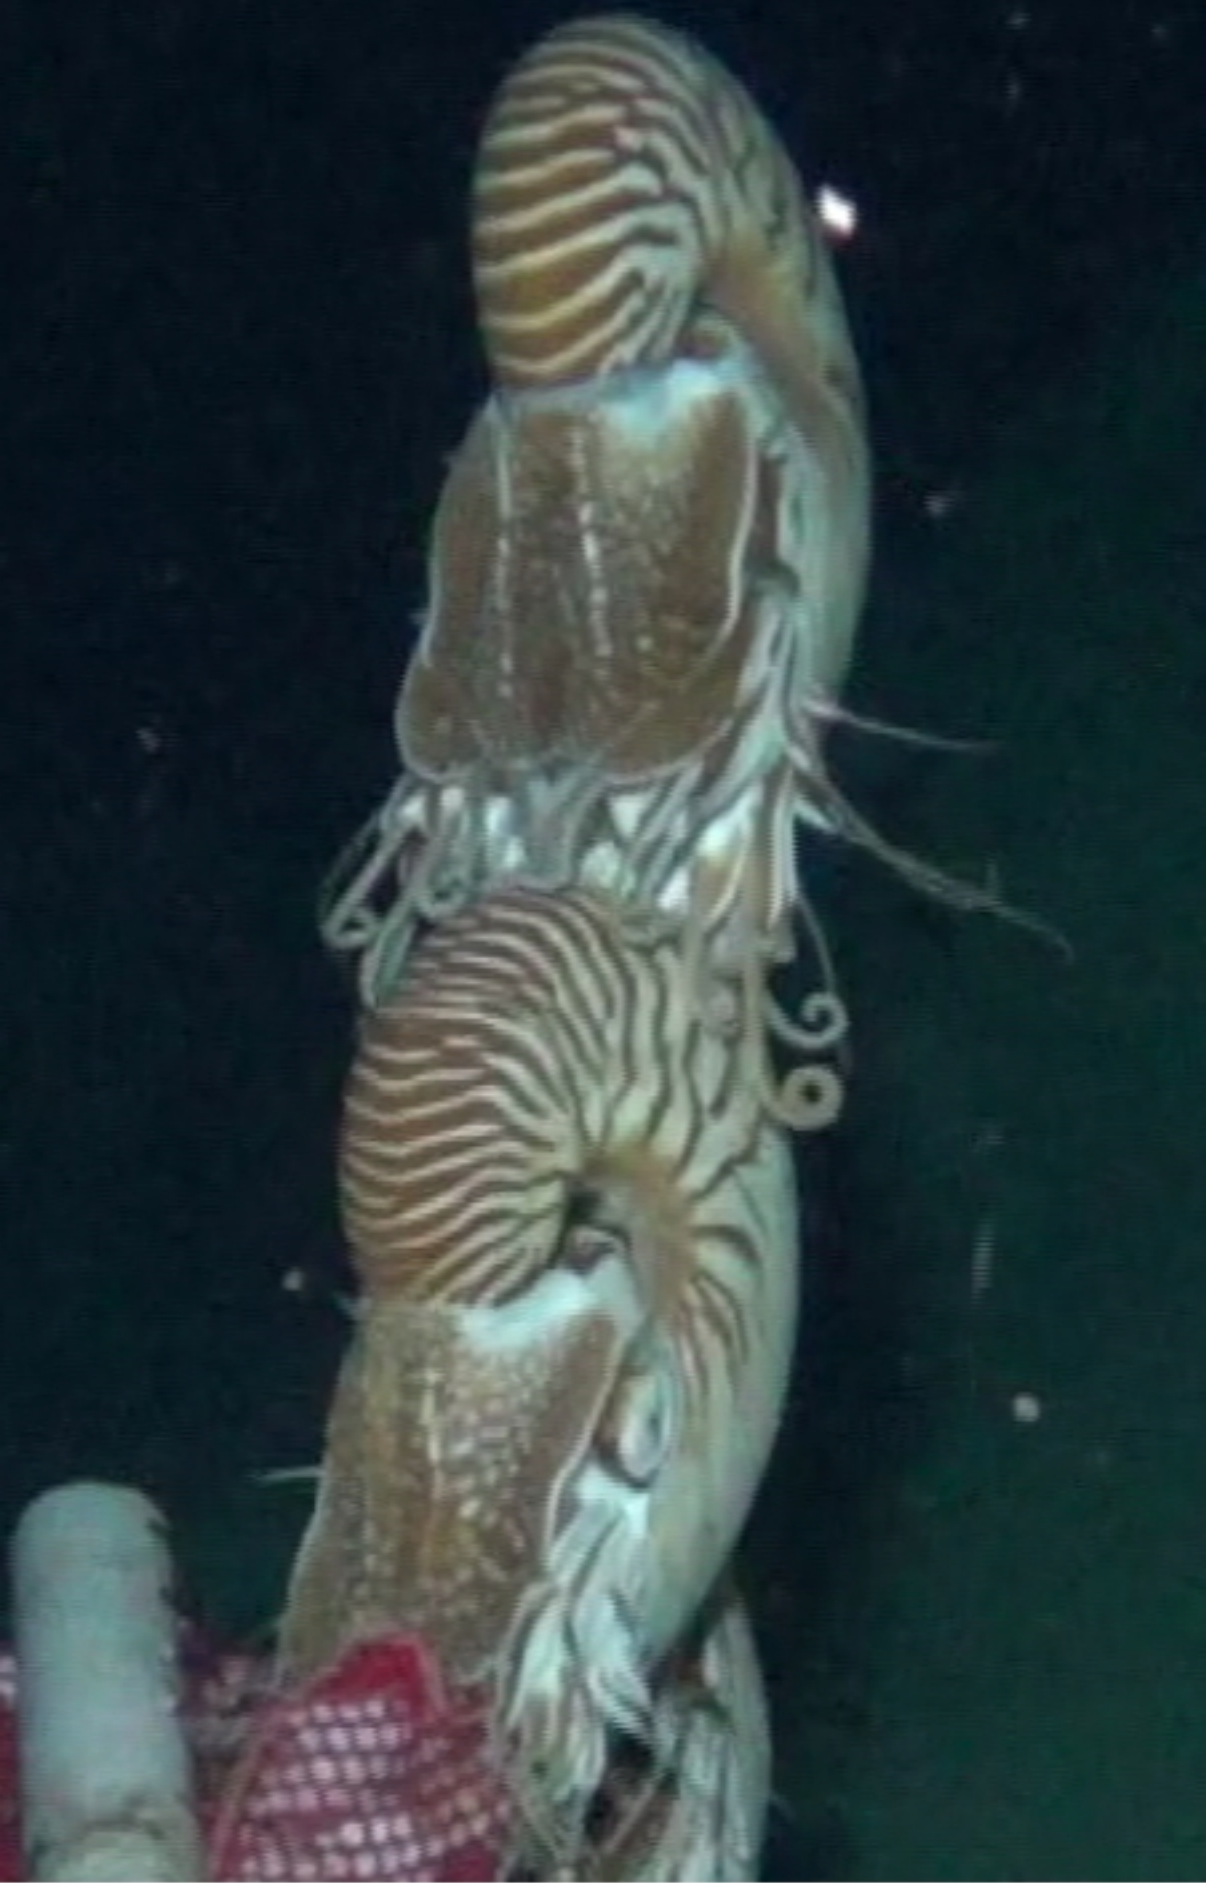

Figure 3

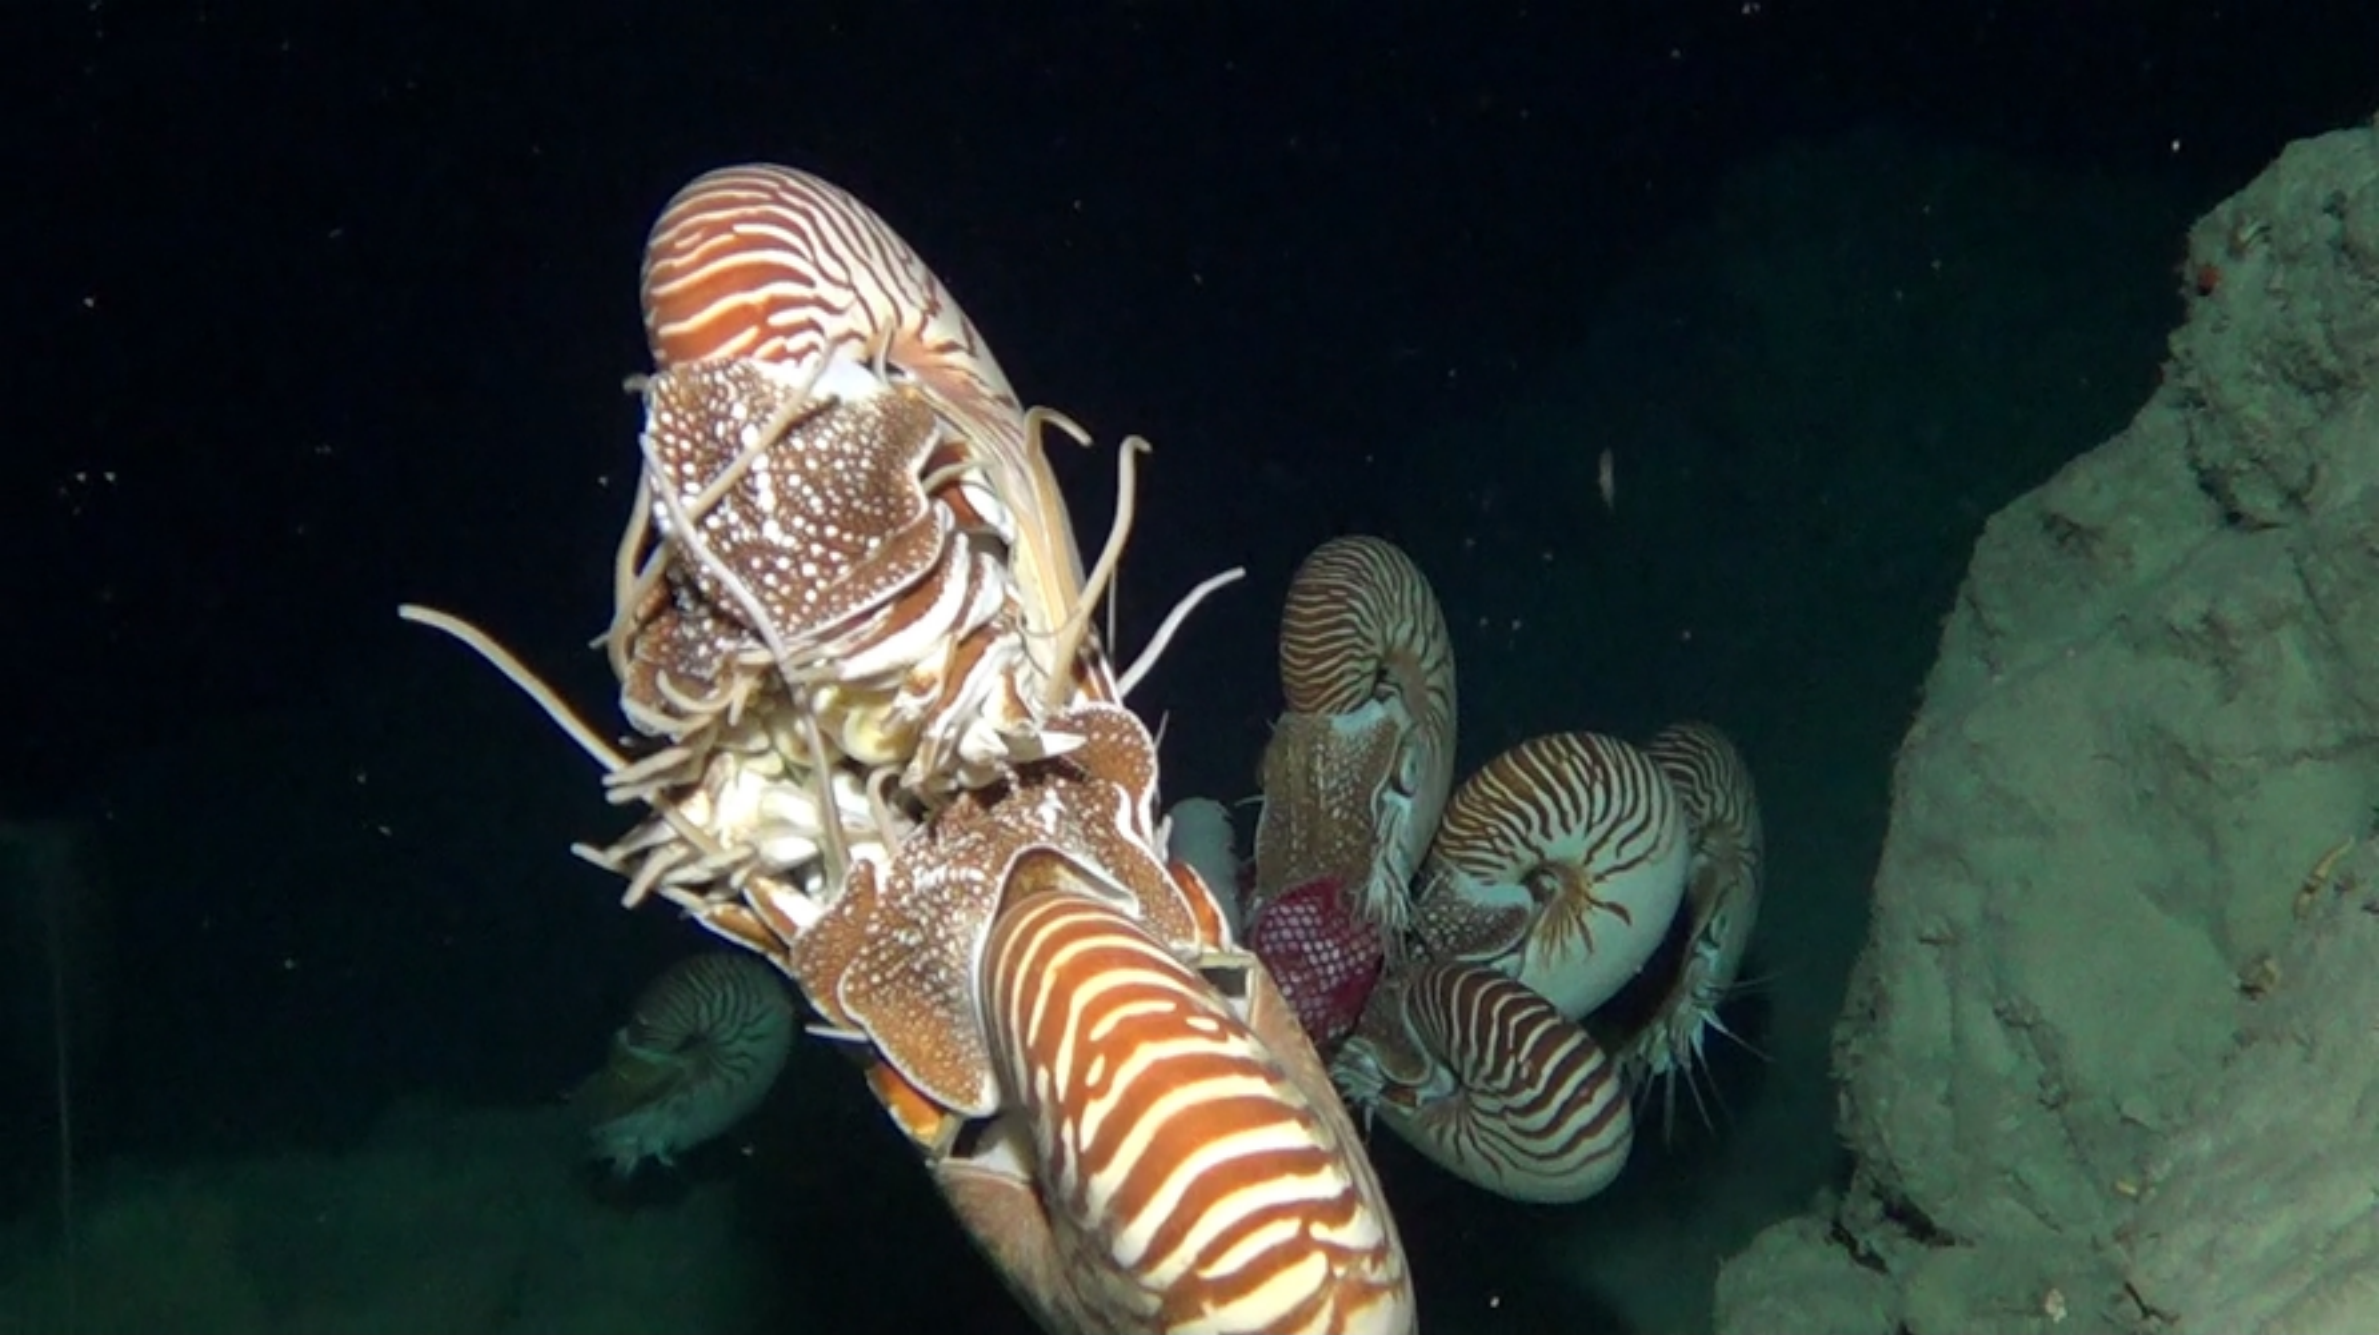

Figure 4
